# Supplementary material for: Ruthenium(II)–Cyclopentadienyl-Derived Complexes as New Emerging Anti-Colorectal Cancer Drugs
Source: MDPI journal article supplement (doi:10.3390/pharmaceutics14061293), 2022-06-17
Supplement: s1 [file s1]

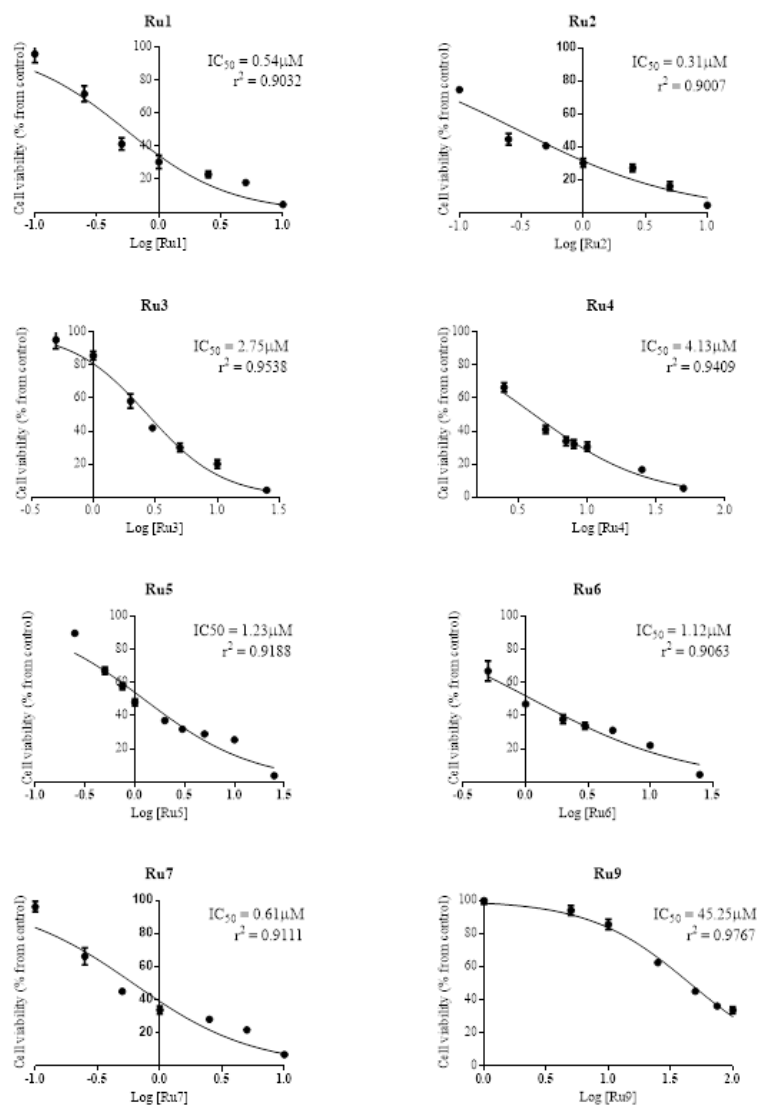

**Figure S1.** Dose-response curves of cell viability in RKO cell line shown for the ruthenium complexes after 48 h incubation.

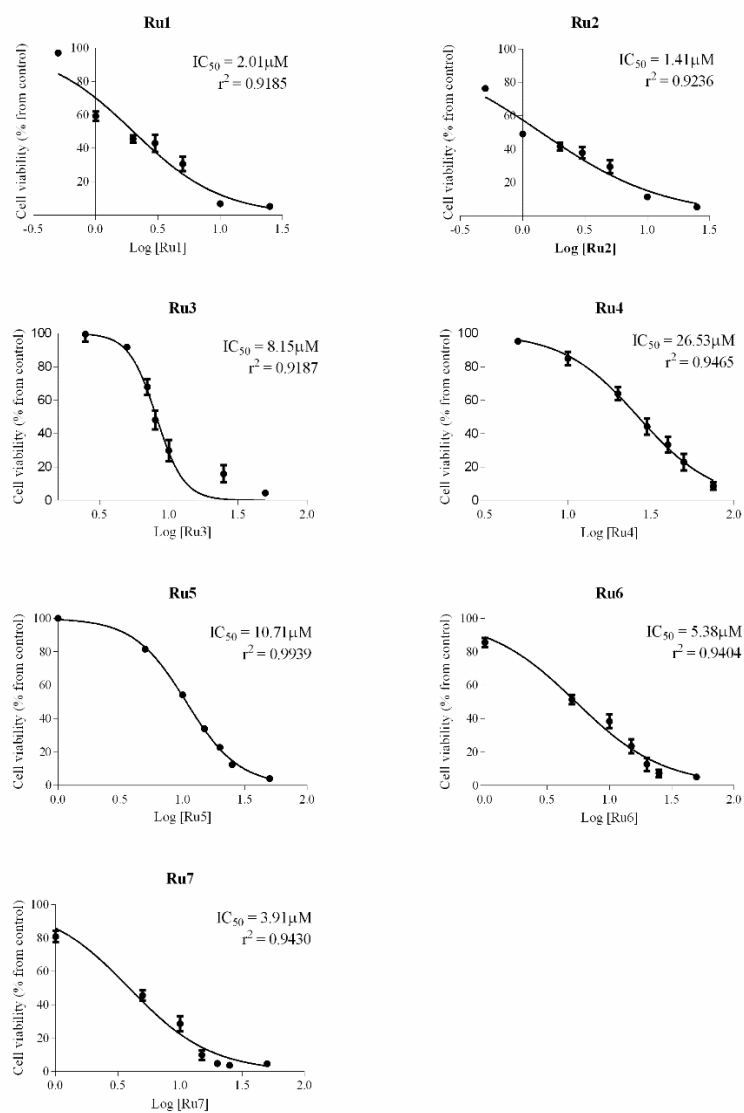

**Figure S2.** Dose-response curves of cell viability in SW480 cell line shown for the ruthenium complexes after 48 h incubation.
